# Supplementary material
Source: publisher site journal article supplement (https://www.spandidos-publications.com/3966/downloadSupplementary)
Supplement: Supplementary file 1 [file downloadSupplementary]

## Sheet: 191221_213drug_list
Table SIV A list of anti-cancer drugs examined and cell viability after treatment with anti-cancer drugs (%)in this study
Cat#	CAS#	Name	Category	Provider	cell viability		SD (standard deviation)
S2409	32981-86-5	10-Deacetylbaccatin-III	Anti-cancer compound	Selleck Chemicals	51.7939	±	3.21337
S1233	362-07-2	2-Methoxyestradiol (2-MeOE2)	Anti-cancer compound	Selleck Chemicals	35.2823	±	21.5705
S2553	5451-09-2	5-Aminolevulinic acid HCl	Anti-cancer compound	Selleck Chemicals	93.9725	±	1.43362
S5716	1231929-97-7	abemaciclib	Anti-cancer compound	Selleck Chemicals	67.5394	±	3.61504
S7158	1231930-82-7	abemaciclib	Anti-cancer compound	Selleck Chemicals	63.0608	±	2.67112
014-21261	50-76-0	Actinomycin D	Anti-cancer compound	Wako	52.8583	±	2.14894
S1983	2922-28-3	Adenine HCl	Anti-cancer compound	Selleck Chemicals	91.8405	±	3.61504
S1011	439081-18-2	Afatinib (BIBW2992)	Tyrosine kinase inhibitor	Selleck Chemicals	53.4783	±	1.08073
S7810	850140-73-7	Afatinib (BIBW2992) Dimaleate	Tyrosine kinase inhibitor	Selleck Chemicals	61.7754	±	2.22928
S1630	315-30-0	Allopurinol	Others	Selleck Chemicals	86.0324	±	3.72741
S2814	127486-61-7	alpelisib	Anti-cancer compound	Selleck Chemicals	52.537	±	1.94811
S1278	645-05-6	Altretamine	Anti-cancer compound	Selleck Chemicals	86.0545	±	1.41156
A4933	112901-68-5	Amifostine trihydrate	Others	LKT labs	17.8125	±	3.73555
S1244	850879-09-3	Amuvatinib (MP-470)	Tyrosine kinase inhibitor	Selleck Chemicals	81.2966	±	1.82761
S1188	120511-73-1	Anastrozole	Anti-cancer compound	Selleck Chemicals	88.635	±	9.46189
S2221	811803-05-1	Apatinib	Tyrosine kinase inhibitor	Selleck Chemicals	94.592	±	3.87613
40370	1327-53-3	Arsenic(III) oxide	Anti-cancer compound	Wako	69.7285	±	0.582424
S2264	71963-77-4	Artemether	Anti-cancer compound	Selleck Chemicals	98.119	±	0.727838
S3017	50-78-2	Aspirin	Anti-cancer compound	Selleck Chemicals	92.2963	±	0.15439
S1457	229975-97-7	Atazanavir Sulfate	Anti-cancer compound	Selleck Chemicals	91.1935	±	5.00664
S1005	319460-85-0	Axitinib	Tyrosine kinase inhibitor	Selleck Chemicals	28.3363	±	1.48618
S1782	320-67-2	Azacitidine	Anti-cancer compound	Selleck Chemicals	53.7219	±	3.33387
S4194	134-58-7	Azaguanine-8	Anti-cancer compound	Selleck Chemicals	93.774	±	3.4848
S1835	83905-01-5	Azithromycin	Anti-cancer compound	Selleck Chemicals	99.2659	±	6.10943
S1369	859212-16-1	Bafetinib (INNO-406)	Tyrosine kinase inhibitor	Selleck Chemicals	45.8692	±	1.82761
S1085	414864-00-9	Belinostat (PXD101)	Anti-cancer compound	Selleck Chemicals	0.390216	±	0.30878
S1212	3543-75-7	Bendamustine HCl	Anti-cancer compound	Selleck Chemicals	94.4577	±	4.8302
S3037	190786-44-8	Bepotastine Besilate	Anti-cancer compound	Selleck Chemicals	97.0162	±	4.0803
S4239	484-20-8	Bergapten	Anti-cancer compound	Selleck Chemicals	58.2423	±	0.286724
S3032	130641-38-2	Bindarit	Anti-cancer compound	Selleck Chemicals	90.8765	±	2.04852
S1214	9041-93-4	Bleomycin Sulfate	Anti-cancer compound	Selleck Chemicals	28.1142	±	2.58052
S1013	179324-69-7	Bortezomib (PS-341)	Anti-cancer compound	Selleck Chemicals	0.721051	±	0.110278
S1014	380843-75-4	Bosutinib (SKI-606)	Tyrosine kinase inhibitor	Selleck Chemicals	77.4969	±	2.82313
S1692	55-98-1	Busulfan	Anti-cancer compound	Selleck Chemicals	79.9671	±	8.02827
S1119	849217-68-1	Cabozantinib (XL184, BMS-907351)	Tyrosine kinase inhibitor	Selleck Chemicals	37.2232	±	2.02912
S4001	1140909-48-3	Cabozantinib malate (XL184)	Tyrosine kinase inhibitor	Selleck Chemicals	47.255	±	4.09705
S2226	870281-82-6	CAL-101 (Idelalisib, GS-1101)	Anti-cancer compound	Selleck Chemicals	77.122	±	0.198501
S1288	7689-03-4	Camptothecin	Anti-cancer compound	Selleck Chemicals	87.2014	±	4.67581
C2634	154-93-8	Camstine	Anti-cancer compound	TCI chemicals	97.9425	±	1.56595
S1019	267243-28-7	Canertinib(CI-1033)	Anti-cancer compound	Selleck Chemicals	0.339747	±	0.0401672
S1156	154361-50-9	Capecitabine	Anti-cancer compound	Selleck Chemicals	86.628	±	6.74904
S2788	1029712-80-8	Capmatinib(INCB28060)	Tyrosine kinase inhibitor	Selleck Chemicals	14.5388	±	0.0200836
S3000	51460-26-5	Carbazochrome sodium sulfonate (AC-17)	Anti-cancer compound	Selleck Chemicals	67.0866	±	2.69079
S1215	41575-94-4	Carboplatin	Anti-cancer compound	Selleck Chemicals	1.70543	±	0.160669
S1289	61422-45-5	Carmofur	Anti-cancer compound	Selleck Chemicals	76.6147	±	7.19015
S1017	288383-20-0	Cediranib (AZD2171)	Tyrosine kinase inhibitor	Selleck Chemicals	43.6399	±	13.9782
S1261	16590-42-5	Celecoxib	Others	Selleck Chemicals	61.5506	±	9.81478
S2408	71610-00-9	Cephalomannine	Anti-cancer compound	Selleck Chemicals	101.383	±	1.91884
S7634	1369761-01-2	Cerdulatinib (PRT062070, PRT2070)	Tyrosine kinase inhibitor	Selleck Chemicals	91.6397	±	0.160669
S7083	1032900-25-6	Ceritinib (LDK378)	Tyrosine kinase inhibitor	Selleck Chemicals	20.9656	±	2.30961
S4288	305-03-3	Chloroambucil	Anti-cancer compound	Selleck Chemicals	69.2465	±	5.08115
S1166	15663-27-1	Cisplatin	Anti-cancer compound	Selleck Chemicals	44.8048	±	0.160669
S1199	4291-63-8	Cladribine	Anti-cancer compound	Selleck Chemicals	22.2253	±	3.44069
S1218	123318-82-1	Clofarabine	Anti-cancer compound	Selleck Chemicals	32.2166	±	7.5651
S2561	50-41-9	Clomifene citrate	Anti-cancer compound	Selleck Chemicals	94.0166	±	0.860172
S2613	60200-06-8	Clorsulon	Anti-cancer compound	Selleck Chemicals	91.8004	±	6.78825
S2900	1004316-88-4	Cobicistat (GS-9350)	Anti-cancer compound	Selleck Chemicals	92.5389	±	3.52891
15605	18080-67-6	Conoidin A	Anti-cancer compound	Cayman chemical	89.0489	±	2.18911
S2559	50-04-4	Cortisone acetate	Anti-cancer compound	Selleck Chemicals	97.8102	±	4.8302
S2730	670220-88-9	Crenolanib (CP-868596)	Tyrosine kinase inhibitor	Selleck Chemicals	83.4858	±	0.56234
S1068	220127-57-1	Crizotinib (PF-02341066)	Tyrosine kinase inhibitor	Selleck Chemicals	80.0716	±	0.803343
S2057	6055-19-2	Cyclophosphamide Monohydrate	Anti-cancer compound	Selleck Chemicals	88.346	±	2.20919
C6645	147-94-4	Cytosine β-D-arabinofuranoside hydrochloride	Anti-cancer compound	Sigma-Aldrich	40.5672	±	2.95229
S1221	4342-03-4	Dacarbazine	Standard chemotherapy reagent	Selleck Chemicals	85.5031	±	10.4765
S2727	1110813-31-4	Dacomitinib (PF299804, PF299)	Tyrosine kinase inhibitor	Selleck Chemicals	63.844	±	1.60669
S2215	208255-80-5	DAPT (GSI-IX)	Anti-cancer compound	Selleck Chemicals	62.3378	±	6.52716
S1021	302962-49-8	Dasatinib	Tyrosine kinase inhibitor	Selleck Chemicals	92.5435	±	0.702925
S7782	863127-77-9	Dasatinib Monohydrate	Tyrosine kinase inhibitor	Selleck Chemicals	16.025	±	1.86777
S3035	23541-50-6	Daunorubicin HCl	Anti-cancer compound	Selleck Chemicals	1.22833	±	0.0882227
S1200	2353-33-5	Decitabine	Anti-cancer compound	Selleck Chemicals	94.1048	±	5.35953
D4227	24584-09-6	Dexrazoxane	Others	TCI chemicals	81.8188	±	5.76399
S1859	56-53-1	Diethylstilbestrol	Anti-cancer compound	Selleck Chemicals	89.9142	±	4.34497
S1148	114977-28-5	Docetaxel	Standard chemotherapy reagent	Selleck Chemicals	40.8845	±	2.16146
S1208	25316-40-9	Doxorubicin (Adriamycin)	Standard chemotherapy reagent	Selleck Chemicals	1.55917	±	0.419058
S2229	496775-61-2	Eltrombopag Olamine	Anti-cancer compound	Selleck Chemicals	81.3566	±	3.94797
S7523	1108743-60-7	Entospletinib (GS-9973)	Tyrosine kinase inhibitor	Selleck Chemicals	66.6557	±	4.37822
S7998	1108743-60-7	Entrectinib (RXDX-101)	Tyrosine kinase inhibitor	Selleck Chemicals	78.8264	±	4.77989
S1250	915087-33-1	Enzalutamide (MDV3100)	Anti-cancer compound	Selleck Chemicals	16.2483	±	0.948395
S2521	51-42-3	Epinephrine Bitartrate	Anti-cancer compound	Selleck Chemicals	90.9769	±	1.1046
S1223	56390-09-1	Epirubicin HCl	Anti-cancer compound	Selleck Chemicals	1.47094	±	0.198501
S8401	1346242-81-6	erdafitinib	Anti-cancer compound	Selleck Chemicals	12.651	±	0.662758
S7786	183321-74-6	Erlotinib	Tyrosine kinase inhibitor	Selleck Chemicals	87.9242	±	0.261087
S1023	183319-69-9	Erlotinib HCl (OSI-744)	Tyrosine kinase inhibitor	Selleck Chemicals	57.4483	±	0.639615
S2233	161796-78-7	Esomeprazole Sodium	Anti-cancer compound	Selleck Chemicals	93.2005	±	0.132334
E0407	52205-73-9	Estramustin sodium phosphate	Anti-cancer compound	Sigma-Aldrich	49.7253	±	3.71546
S1225	33419-42-0	Etoposide	Anti-cancer compound	Selleck Chemicals	43.2885	±	10.0353
S1120	159351-69-6	Everolimus (RAD001)	Anti-cancer compound	Selleck Chemicals	53.765	±	7.54304
S1196	107868-30-4	Exemestane	Anti-cancer compound	Selleck Chemicals	84.7753	±	8.24883
S2467	104227-87-4	Famciclovir	Anti-cancer compound	Selleck Chemicals	98.6483	±	0.198501
S7605	1206161-97-8	Filgotinib (GLPG0634)	Tyrosine kinase inhibitor	Selleck Chemicals	82.0397	±	1.40585
S1299	50-91-9	Floxuridine	Anti-cancer compound	Selleck Chemicals	70.9905	±	4.4773
S1491	21679-14-1	Fludarabine	Anti-cancer compound	Selleck Chemicals	84.665	±	6.37409
S1229	75607-67-9	Fludarabine Phosphate	Anti-cancer compound	Selleck Chemicals	82.9667	±	6.13148
S2030	30484-77-6	Flunarizine 2HCl	Anti-cancer compound	Selleck Chemicals	92.5635	±	2.36986
S1209	51-21-8	Fluorouracil (5-Fluoracil, 5-FU)	Anti-cancer compound	Selleck Chemicals	85.9001	±	5.80065
S1908	13311-84-7	Flutamide	Anti-cancer compound	Selleck Chemicals	88.9879	±	5.00664
S1111	849217-64-7	Foretinib (GSK1363089)	Tyrosine kinase inhibitor	Selleck Chemicals	85.1929	±	2.18911
S2625	901119-35-5	Fostamatinib (R788)	Tyrosine kinase inhibitor	Selleck Chemicals	-0.26276	±	0.241003
S1191	129453-61-8	Fulvestrant	Anti-cancer compound	Selleck Chemicals	88.2821	±	4.91842
S1025	184475-35-2	Gefitinib(ZD1839)	Tyrosine kinase inhibitor	Selleck Chemicals	69.7486	±	4.82006
S1714	95058-81-4	Gemcitabine	Standard chemotherapy reagent	Selleck Chemicals	28.3563	±	0.984095
G0367	122111-03-9	Gemcitabine hydrochrolide	Standard chemotherapy reagent	TCI chemicals	26.1271	±	3.29371
S2413	27741-01-1	Geniposidic acid	Anti-cancer compound	Selleck Chemicals	100.633	±	3.37452
S1342	446-72-0	Genistein	Tyrosine kinase inhibitor	Selleck Chemicals	72.0582	±	3.43429
082-07741	26833-87-4	Homoharringtonine	Anti-cancer compound	Wako	0.158995	±	0.100418
S1896	127-07-1	Hydroxyurea	Anti-cancer compound	Selleck Chemicals	92.5168	±	2.05118
S2680	936563-96-1	Ibrutinib (PCI-32765)	Tyrosine kinase inhibitor	Selleck Chemicals	69.2666	±	1.88786
S1228	57852-57-0	Idarubicin HCl	Anti-cancer compound	Selleck Chemicals	2.70606	±	0.0661671
S1302	3778-73-2	Ifosfamide	Standard chemotherapy reagent	Selleck Chemicals	84.7753	±	12.0865
S2475	152459-95-5	Imatinib (STI571)	Tyrosine kinase inhibitor	Selleck Chemicals	94.4514	±	0.964012
S1026	220127-57-1	Imatinib Mesylate (STI571)	Tyrosine kinase inhibitor	Selleck Chemicals	63.1166	±	1.27923
S1198	97682-44-5	Irinotecan	Anti-cancer compound	Selleck Chemicals	38.326	±	3.83769
S2476	84625-61-6	Itraconazole	Anti-cancer compound	Selleck Chemicals	90.0466	±	1.7424
S7930	219989-84-1	Ixabepilone (BMS-247550)	Anti-cancer compound	Selleck Chemicals	91.6397	±	4.01672
S3024	84057-84-1	Lamotrigine	Anti-cancer compound	Selleck Chemicals	64.5502	±	0.242613
S2111	231277-92-2	Lapatinib	Tyrosine kinase inhibitor	Selleck Chemicals	60.5503	±	1.04435
S1028	388082-77-7	Lapatinib (GW-572016) Ditosylate	Tyrosine kinase inhibitor	Selleck Chemicals	72.721	±	2.04852
ab142129	191732-72-6	Lenalidomide	Anti-cancer compound	Abcam	81.1761	±	7.73218
S1164	417716-92-8	Lenvatinib (E7080)	Tyrosine kinase inhibitor	Selleck Chemicals	42.0533	±	0.743092
S1235	112809-51-5	Letrozole	Anti-cancer compound	Selleck Chemicals	87.0691	±	6.17559
S3031	668270-12-0	Linagliptin	Anti-cancer compound	Selleck Chemicals	28.0551	±	7.75226
S2479	859-18-7	Lincomycin HCl	Anti-cancer compound	Selleck Chemicals	47.6114	±	0.110278
S1003	796967-16-3	Linifanib (ABT-869)	Tyrosine kinase inhibitor	Selleck Chemicals	78.8264	±	0.522173
S1091	867160-71-2	Linsitinib (OSI-906)	Tyrosine kinase inhibitor	Selleck Chemicals	14.3179	±	0.160669
S1840	13010-47-4	Lomustine	Anti-cancer compound	Selleck Chemicals	86.8706	±	7.07988
S4252	55-86-7	Mechlorethamine HCl	Anti-cancer compound	Selleck Chemicals	88.0447	±	2.75145
S1304	595-33-5	Megestrol Acetate	Anti-cancer compound	Selleck Chemicals	88.5067	±	0.482006
S1305	50-44-2	Mercaptopurine (6-MP)	Anti-cancer compound	Selleck Chemicals	88.6571	±	4.98459
S1735	19767-45-4	Mesna	Others	Selleck Chemicals	104.714	±	7.71949
S2527	3963-95-9	Methacycline HCl	Anti-cancer compound	Selleck Chemicals	99.9496	±	2.29379
S1210	59-05-2	Methotrexate	Anti-cancer compound	Selleck Chemicals	92.583	±	1.1469
S1952	298-81-7	Methoxsalen	Anti-cancer compound	Selleck Chemicals	61.1729	±	8.05351
S4009	223673-61-8	Mirabegron	Anti-cancer compound	Selleck Chemicals	91.9654	±	0.132334
S5328	145435-72-9	Mithramycin A	Anti-cancer compound	Selleck Chemicals	85.5745	±	4.21755
S8146	50-07-7	Mitomycin C	Anti-cancer compound	Selleck Chemicals	33.6383	±	3.09287
S1732	53-19-0	Mitotane	Anti-cancer compound	Selleck Chemicals	89.4511	±	0.220557
S1889	65271-80-9	Mitoxantrone	Anti-cancer compound	Selleck Chemicals	0.83133	±	0.264668
S2486	3160-91-6	Moroxydine HCl	Anti-cancer compound	Selleck Chemicals	89.792	±	5.18156
S2216	366017-09-6	Mubritinib (TAK 165)	Tyrosine kinase inhibitor	Selleck Chemicals	0.0987443	±	0.160669
S3066	357-08-4	Naloxone HCl	Anti-cancer compound	Selleck Chemicals	68.2776	±	2.95546
S1213	121032-29-9	Nelarabine	Anti-cancer compound	Selleck Chemicals	97.3911	±	3.0878
S1033	641571-10-0	Nilotinib (AMN-107)	Tyrosine kinase inhibitor	Selleck Chemicals	21.1263	±	2.22928
S2721	75530-68-6	Nilvadipine	Anti-cancer compound	Selleck Chemicals	100.501	±	1.7424
S1010	656247-17-5	Nintedanib (BIBF 1120)	Tyrosine kinase inhibitor	Selleck Chemicals	63.9043	±	2.83178
S4363	912-60-7	Noscapine HCl	Anti-cancer compound	Selleck Chemicals	98.0528	±	3.92591
S1061	890090-75-2	Nutlin-3	Anti-cancer compound	Selleck Chemicals	51.1311	±	3.15312
S2183	872511-34-7	NVP-BGJ389	Anti-cancer compound	Selleck Chemicals	47.4558	±	1.52635
S1060	763113-22-0	Olaparib (AZD2281, Ku-0059436)	Anti-cancer compound	Selleck Chemicals	70.792	±	5.29336
S1470	252916-29-3	Orantinib (TSU-68, SU6668)	Tyrosine kinase inhibitor	Selleck Chemicals	0.540583	±	0
S2205	183320-51-6	OSI-420	Anti-cancer compound	Selleck Chemicals	103.851	±	3.73555
S7297	1421373-65-0	Osimertinib (AZD9291)	Tyrosine kinase inhibitor	Selleck Chemicals	85.1326	±	7.91293
S1224	61825-94-3	Oxaliplatin	Anti-cancer compound	Selleck Chemicals	58.4408	±	7.19015
S1150	33069-62-4	Paclitaxel	Anti-cancer compound	Selleck Chemicals	25.7984	±	1.01456
S2410	23180-57-6	Paeoniflorin	Anti-cancer compound	Selleck Chemicals	82.5619	±	1.96819
S1116	827022-32-2	palbosiclib	Anti-cancer compound	Selleck Chemicals	57.1763	±	0.321337
S1579	827022-33-3	palbosiclib	Anti-cancer compound	Selleck Chemicals	67.5595	±	0.823427
S1035	635702-64-6	Pazopanib HCl (GW786034 HCl)	Tyrosine kinase inhibitor/standard chemotherapeutic reagent	Selleck Chemicals	88.4665	±	0.56234
S7785	357166-30-4	Pemetrexed Disodium Hydrate	Anti-cancer compound	Selleck Chemicals	88.1652	±	0.461922
10722	53910-65-0	Pentostatin	Others	Sigma-Aldrich	74.6289	±	8.93719
S7818	1029044-16-3	Pexidartinib (PLX3397)	Tyrosine kinase inhibitor	Selleck Chemicals	36.6107	±	1.24518
S1654	50-33-9	Phenylbutazone	Anti-cancer compound	Selleck Chemicals	77.4969	±	8.33705
S5004	137071-32-0	Pimecrolimus	Anti-cancer compound	Selleck Chemicals	17.2849	±	2.73491
S2590	111025-46-8	Pioglitazone	Others	Selleck Chemicals	98.538	±	3.83769
sc-476451	54-91-1	Pipobroman-D8	Anti-cancer compound	Santa cruz	42.3345	±	4.43847
S1567	19171-19-8	Pomalidomide	Anti-cancer compound	Selleck Chemicals	100.06	±	2.49229
S1490	943319-70-8	Ponatinib (AP24534)	Tyrosine kinase inhibitor	Selleck Chemicals	68.8448	±	1.86777
S7358	1092364-38-9	Poziotinib (HM781-36B)	Tyrosine kinase inhibitor	Selleck Chemicals	88.3661	±	0.702925
S1497	146464-95-1	Pralatrexate	Others	Selleck Chemicals	85.233	±	0.863594
S1995	366-70-1	Procarbazine HCl	Anti-cancer compound	Selleck Chemicals	87.1209	±	3.51463
S1526	950769-58-1	Quizartinib (AC220)	Others	Selleck Chemicals	65.2097	±	2.24936
ab141959	82640-04-8	Raloxifene hydrochloride	Anti-cancer compound	Abcam	83.5259	±	5.42257
S1178	755037-03-7	Regorafenib (BAY 73-4506)	Tyrosine kinase inhibitor	Selleck Chemicals	58.3813	±	2.04852
S7030	939981-39-2	RG-7112	Anti-cancer compound	Selleck Chemicals	48.46	±	3.53471
S7284	1374640-70-6	Rociletinib (CO-1686, AVL-301)	Tyrosine kinase inhibitor	Selleck Chemicals	42.8165	±	0.461922
S3020	128517-07-7	Romidepsin (FK228, Depsipeptide)	Anti-cancer compound	Selleck Chemicals	1.95617	±	0.198501
S2556	122320-73-4	Rosiglitazone	Anti-cancer compound	Selleck Chemicals	89.9142	±	0.419058
S1378	941678-49-5	Ruxolitinib (INCB018424)	Tyrosine kinase inhibitor	Selleck Chemicals	88.238	±	1.61007
S1006	379231-04-6	Saracatinib (AZD0530)	Tyrosine kinase inhibitor	Selleck Chemicals	75.8942	±	4.90039
S7397	284461-73-0	Sorafenib	Anti-cancer compound	Selleck Chemicals	40.4433	±	4.49936
S1040	475207-59-1	Sorafenib Tosylate	Anti-cancer compound	Selleck Chemicals	41.2153	±	3.37452
S1312	18883-66-4	Streptozotocin (STZ)	Anti-cancer compound	Selleck Chemicals	93.2447	±	10.3662
S2007	38194-50-2	Sulindac	Anti-cancer compound	Selleck Chemicals	97.4438	±	3.43429
S7781	557795-19-4	Sunitinib	Tyrosine kinase inhibitor	Selleck Chemicals	90.5753	±	2.79162
S1042	341031-54-7	Sunitinib Malate	Tyrosine kinase inhibitor	Selleck Chemicals	83.1873	±	3.57302
S5003	104987-11-3	Tacrolimus (FK506)	Anti-cancer compound	Selleck Chemicals	91.2596	±	0.926339
S1108	761439-42-3	TAE684(NVP-TAE684)	Anti-cancer compound	Selleck Chemicals	73.2231	±	2.95229
S2225	901-47-3	TAME	Anti-cancer compound	Selleck Chemicals	101.736	±	3.77152
S1300	17902-23-7	Tegafur (FT-207, NSC 148958)	Anti-cancer compound	Selleck Chemicals	83.077	±	5.31542
S2099	110221-44-8	Temocapril HCl	Anti-cancer compound	Selleck Chemicals	87.6832	±	4.23763
S1237	85622-93-1	Temozolomide	Anti-cancer compound	Selleck Chemicals	85.1282	±	8.60172
S1044	162635-04-3	Temsirolimus (CCI-779, NSC 683864)	Anti-cancer compound	Selleck Chemicals	71.5639	±	4.16852
S1787	29767-20-2	Teniposide	Anti-cancer compound	Selleck Chemicals	19.2699	±	2.16146
S1193	50-35-1	Thalidomide	Others	Selleck Chemicals	101.89	±	2.47024
S1774	154-42-7	Thioguanine	Anti-cancer compound	Selleck Chemicals	80.4531	±	2.79162
S2753	905854-02-6	Tivantinib (ARQ 197)	Tyrosine kinase inhibitor	Selleck Chemicals	17.23	±	1.1046
S1207	475108-18-0	Tivozanib (AV-951)	Tyrosine kinase inhibitor	Selleck Chemicals	85.7552	±	1.86777
S5001	540737-29-9	Tofacitinib (CP-690550) Citrate	Tyrosine kinase inhibitor	Selleck Chemicals	93.5755	±	0.242613
S2443	64-77-7	Tolbutamide	Anti-cancer compound	Selleck Chemicals	92.3624	±	3.4848
S2058	2398-96-1	Tolnaftate	Anti-cancer compound	Selleck Chemicals	89.8924	±	6.24599
S1231	119413-54-6	Topotecan HCl	Anti-cancer compound	Selleck Chemicals	41.2594	±	2.18351
S1439	53902-12-8	Tranilast	Others	Selleck Chemicals	78.264	±	3.69538
S4736	15421-84-8	Trapidil	Others	Selleck Chemicals	87.1611	±	0.823427
S1653	302-79-4	Tretinoin	Anti-cancer compound	Selleck Chemicals	99.5526	±	5.95504
S7342	1493694-70-4	UNC2250	Anti-cancer compound	Selleck Chemicals	80.895	±	0.702925
S1046	443913-73-3	Vandetanib (ZD6474)	Tyrosine kinase inhibitor	Selleck Chemicals	0.610773	±	0.132334
S1101	212141-51-0	Vatalanib (PTK787) 2HCl	Tyrosine kinase inhibitor	Selleck Chemicals	68.644	±	2.18911
S1267	918504-65-1	Vemurafenib (PLX4032, RG7204)	Anti-cancer compound	Selleck Chemicals	91.8772	±	1.1469
S4505	143-67-9	Vinblastine	Anti-cancer compound	Selleck Chemicals	10.3414	±	0.482006
S1241	2068-78-2	Vincristine	Anti-cancer compound	Selleck Chemicals	11.9915	±	2.11735
S1082	879085-55-9	Vismodegib (GDC-0449)	Anti-cancer compound	Selleck Chemicals	77.9821	±	7.58716
S1047	149647-78-9	Vorinostat (SAHA, MK0683)	Anti-cancer compound	Selleck Chemicals	17.6157	±	2.58052
S1118	956958-53-5	XL147 analog	Anti-cancer compound	Selleck Chemicals	92.1217	±	0.682842
S1314	118072-93-8	Zoledronic Acid	Others	Selleck Chemicals	78.505	±	0.682842
